# Supplementary material for: A sustained-release PDGF-BB nanocomposite hydrogel for DM-associated bone regeneration
Source: Royal Society of Chemistry journal article supplement (doi:10.1039/d2tb02037h), 2022-12-06
Supplement: d2tb02037h2.pdf [file d2tb02037h2.pdf]

## Supporting Information

### Sustained-release PDGF-BB nanocomposite hydrogel for bone regeneration in diabetes

Li Yaxin, Liu Ziyang, Zhao Chen, Xu Chenci, Li Dejian\*, Lin Kaili\*, Liu Jiaqiang\*

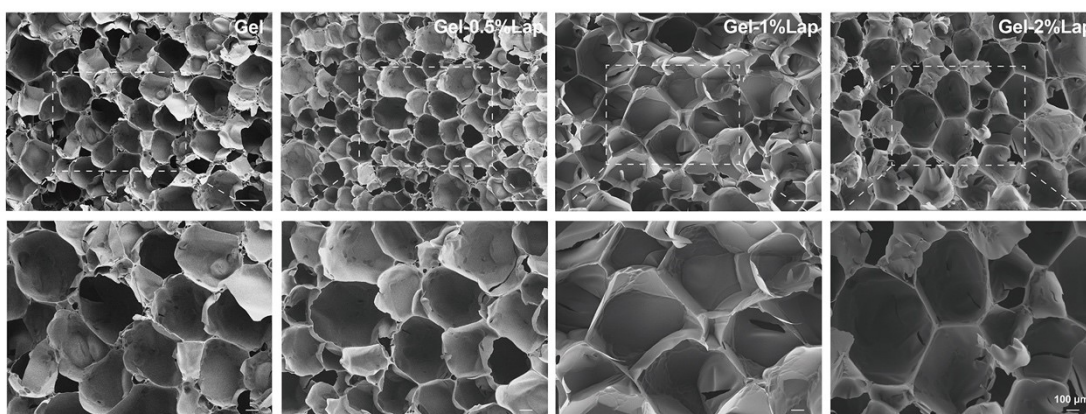

**Fig. S1.** SEM images of Gel, Gel-0.5%Lap, Gel-1%Lap, and Gel-2%Lap. scale bars = 100  $\mu\text{m}$ .

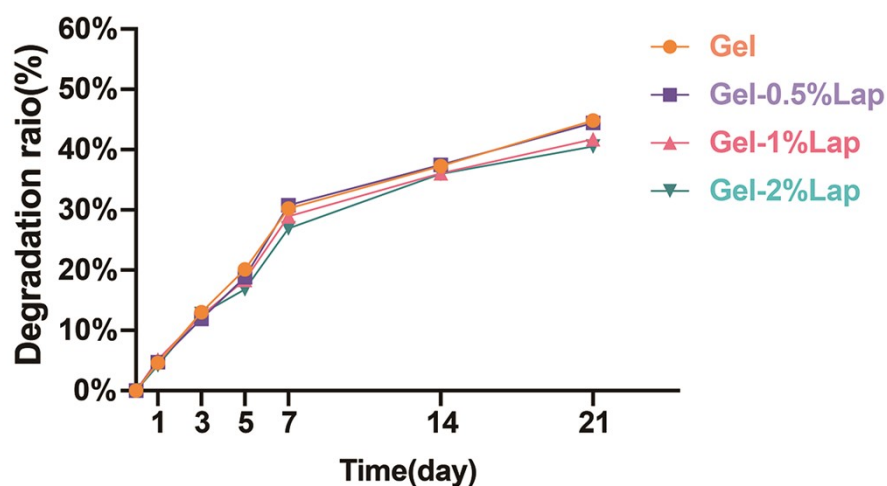

**Fig. S2.** Weight loss conditions with material degradation.

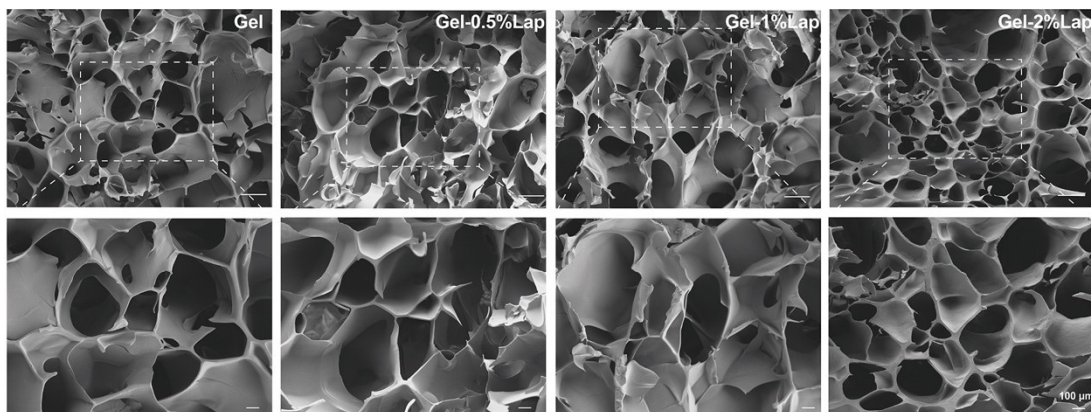

**Fig. S3.** SEM images of Gel, Gel-0.5%Lap, Gel-1%Lap, and Gel-2%Lap after 21 days of degradation. scale bars= 100  $\mu\text{m}$

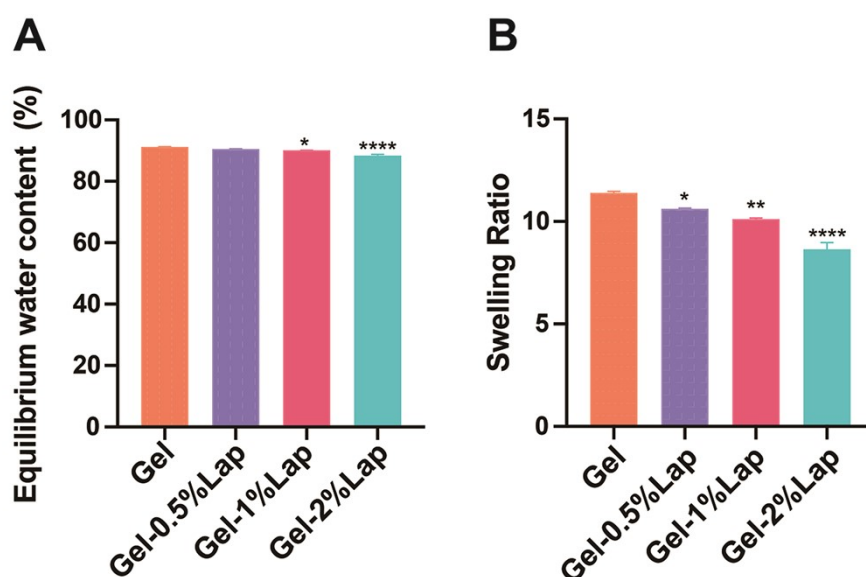

**Fig. S4.** (A) The swelling ratio and (B) equilibrium water content analysis of hydrogels with different content of Laponite.

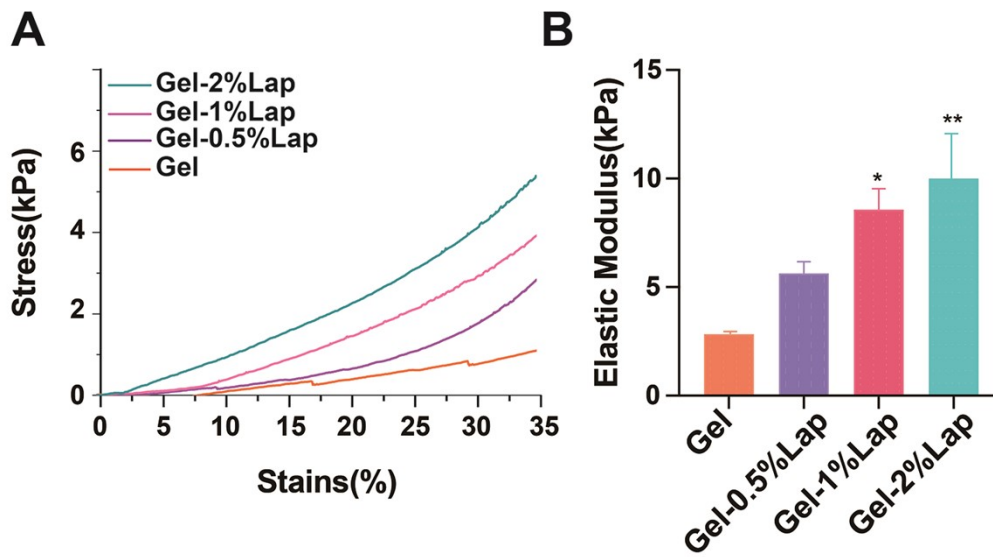

Fig. S5. (A) The stress–strain curve and (B) elastic modulus of Gel, Gel-0.5%Lap, Gel-1%Lap, and Gel-2%Lap.

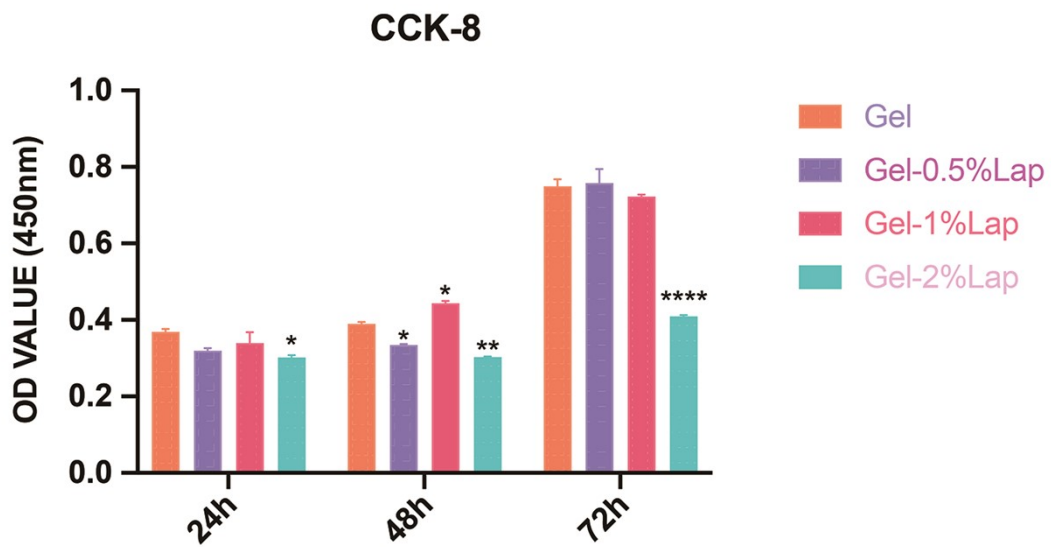

Fig. S6. Cell proliferation of BMSCs cultured on hydrogels with different laponite contents after culturing for 1, 2, 3 days.

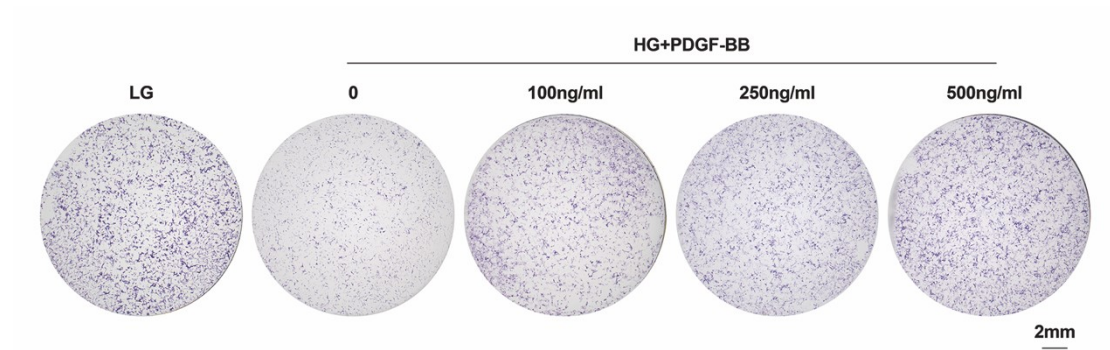

**Fig. S7.** ALP-stained images of rBMSCs co-cultured with PDGF@Gel hydrogels with different loading concentrations for 4 days. scale bars = 2 mm.

**Table S1.** The primer sequences of rBMSC in the qRT-PCR analysis of gene expression.

| Gene                            | Gene forward primer sequence (5'-3') | Reverse primer sequences (5'-3') |
|---------------------------------|--------------------------------------|----------------------------------|
| <i>ALP</i>                      | TATGTCTGGAACCGCACTGAAC               | CACTAGCAAGAAGAAGCCTTTGG          |
| <i>Runx2</i>                    | ATCCAGCCACCTTCACTTACAAA              | GGGACCATTGGGAACTGATAGG           |
| <i>OPN</i>                      | CCAAGCGTGAAACACACAGCC                | GGCTTTGGAACTCGCCTGACTG           |
| <i>Col-1</i>                    | CTGCCAGAAGAATATGTATCACC              | GAAGCAAAGTTTCCTCCAAGACC          |
| <i>VEGF</i>                     | GGCTCTGAAACCATGAACTTTCT              | GCAATAGCTGCGCTGGTAGAC            |
| <i>ANG-1</i>                    | GGACAGCAGGCAAACAGAGCAGC              | CCACAGGCATCAAACCAACCAACC         |
| <i><math>\beta</math>-actin</i> | GTAAAGACCTCTATGCCAACA                | GGAATCATCGTACTCCTGCT             |
