# Supplementary figures and images for: A sustained-release PDGF-BB nanocomposite hydrogel for DM-associated bone regeneration
Source: Royal Society of Chemistry journal article supplement (doi:10.1039/d2tb02037h), 2022-12-06

Raw data associated with Fig. 6a

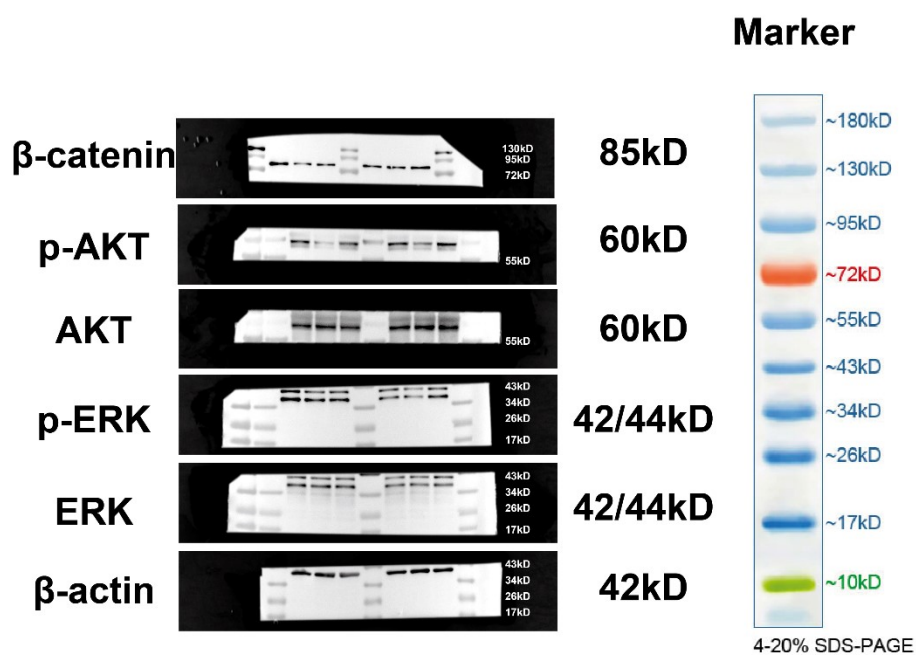

Supplement: d2tb02037h1.pdf [file d2tb02037h1.pdf]
